# Supplementary material
Source: PubMed Central journal article supplement (PMC3619332)
Supplement: 1301201110_pnas.201301201SI.pdf [file 1301201110_pnas.201301201SI.pdf]

# Supporting Information

Xu et al. 10.1073/pnas.1301201110

## SI Materials and Methods

**1. Molecular Cloning.** The *ccrads1* highly reducing iterative polyketide synthase (hrPKS) and the *ccrads2* nonreducing iterative polyketide synthase (nrPKS) genes were amplified separately using fosmid fCchi01A05 as the template (1). The two exons of *ccrads1* were amplified with the primer pairs RADS1\_Up\_F (NdeI) and RADS1\_Up\_R and RADS1\_Dn\_F and RADS1\_Dn\_R (PmeI). The resulting 3,957- and 3,375-bp products were fused by PCR using primers RADS1\_Up\_F (NdeI) and RADS1\_Dn\_R (PmeI), and the fused product was cloned into pJET1.2. After sequence verification, the *NdeI-PmeI* fragment was inserted into the same cloning sites of YEpADH2p-FLAG-TRP to yield YEpCcRADS1. The single exon of *ccrads2* was amplified using primers RADS2\_F (NdeI) and RADS2\_R (PmeI) to give a 6,439-bp product and cloned into pJET1.2. After sequence verification, the *NdeI-PmeI* fragment was inserted into the same sites of YEpADH2p-FLAG-URA to generate plasmid YEpCcRADS2.

The construction of the YEpAtCURS1 and YEpAtCURS2 expression plasmids with the *atcurS1* and *atcurS2* genes for the dehydrocurvularin hrPKS and nrPKS, respectively, followed a similar scheme and has been described.

The Udwy–Merski algorithm was used to predict domain boundaries in nrPKS (2).

YEpAtCURS2-ΔPT is based on YEpADH2p-FLAG-URA and carries the intronless *atcurS2* gene with the product template (PT) domain deleted (Pro<sup>1270</sup> to Ser<sup>1614</sup>). Using YEpAtCURS2 as the template, 470- and 1,046-bp PCR products were generated by PCR using primers At\_PT\_Del\_Up\_F (AgeI) and At\_PT\_Del\_Up\_R and At\_PT\_Del\_Dn\_F and At\_PT\_Del\_Dn\_R (NheI), respectively. These PCR products were fused by overlap extension PCR using primers At\_PT\_Del\_Up\_F and At\_PT\_Del\_Dn\_R. The resulting 1,516-bp PCR product was cloned into pJET1.2 and verified by sequencing, and the *AgeI-NheI* fragment was inserted into the same cloning sites of YEpAtCURS2 to yield plasmid YEpAtCURS2-ΔPT.

YEpCcRADS2-ΔPT is based on YEpADH2p-FLAG-URA and carries the intronless *ccrads2* gene with the PT domain deleted (Gln<sup>1284</sup> to Thr<sup>1640</sup>). Using YEpCcRADS2 as the template, 360- and 1,388-bp PCR products were generated by PCR using primers Cc\_PT\_Del\_Up\_F (Bsu36I) and Cc\_PT\_Del\_Up\_R and Cc\_PT\_Del\_Dn\_F and Cc\_PT\_Del\_Dn\_R (BglII), respectively. These PCR products were fused by overlap extension PCR using primers Cc\_PT\_Del\_Up\_F and Cc\_PT\_Del\_Dn\_R. The resulting 1,748-bp PCR product was cloned into pJET1.2 and verified by sequencing, and the *Bsu36I-BglII* fragment was inserted into the same cloning sites of YEpCcRADS2 to yield plasmid YEpCcRADS2-ΔPT.

YEpAtCURS2-ΔPT+PT<sub>AtCURS2</sub> is based on YEpADH2p-FLAG-URA and carries both the PT domain-deleted *atcurS2* gene and a separate gene encoding PT<sub>AtCURS2</sub> driven by separate copies of the alcohol dehydrogenase (ADH2) promoter. Using YEpAtCURS2 as the template, a 683-bp ADH2 promoter fragment, the 1,060-bp PT<sub>AtCURS2</sub> gene fragment, and a 469-bp ADH2 terminator fragment were separately amplified with primers At\_PT\_p\_F (KpnI), At\_PT\_p\_R, At\_PT\_F, and At\_PT\_R and At\_PT\_t\_F and At\_PT\_t\_R (HpaI), respectively. These PCR products were fused by overlap extension PCR using primers At\_PT\_p\_F (KpnI) and At\_PT\_t\_R (HpaI) and cloned into pJET1.2. After sequence verification, the *KpnI-HpaI* fragment was inserted into the same cloning sites of YEpAtCURS2-ΔPT to yield plasmid YEpAtCURS2-ΔPT+PT<sub>AtCURS2</sub>.

YEpCcRADS2-ΔPT+PT<sub>CcRADS2</sub> is based on YEpADH2p-FLAG-URA and carries both the PT domain-deleted *ccrads2* gene and a separate gene encoding PT<sub>CcRADS2</sub> driven by separate copies of the ADH2 promoter. Using YEpCcRADS2 as the template, a 655-bp ADH2 promoter fragment, the 1,101-bp PT<sub>CcRADS2</sub> gene fragment, and a 392-bp ADH2 terminator fragment were separately amplified with primers Cc\_PT\_p\_F (EcoRI) and Cc\_PT\_p\_R, Cc\_PT\_F and Cc\_PT\_R, and Cc\_PT\_t\_F and Cc\_PT\_t\_R (HpaI), respectively. These PCR products were fused by overlap extension PCR using primers Cc\_PT\_p\_F (EcoRI) and Cc\_PT\_t\_R (HpaI) and cloned into pJET1.2. After sequence verification, the *EcoRI-HpaI* fragment was inserted into the same cloning sites of YEpCcRADS2-ΔPT to yield plasmid YEpCcRADS2-ΔPT+PT<sub>CcRADS2</sub>.

The plasmid YEpAtCURS2-PT<sub>CcRADS2</sub>, in which the gene segment encoding PT<sub>AtCURS2</sub> was replaced by the one encoding PT<sub>CcRADS2</sub>, was constructed using the following steps. A 471-bp upstream fragment encoding P<sup>120</sup>-G<sup>1269</sup> of AtCURS2 was amplified with primers At\_PT\_Del\_Up\_F (AgeI) and At\_PT\_Up\_R. A 1,094-bp fragment encoding CcRADS2 Q<sup>1284</sup>-T<sup>1640</sup> was amplified with primers Cc\_PT\_to\_At\_F and Cc\_PT\_to\_At\_R. A 1,046-bp downstream fragment encoding S<sup>1614</sup>-A<sup>1961</sup> of AtCURS2 was amplified with primers At\_PT\_Del\_Dn\_F and At\_PT\_Del\_Dn\_R (NheI). These three PCR fragments were then fused using primers At\_PT\_Del\_Up\_F (AgeI) and At\_PT\_Del\_Dn\_R (NheI) and cloned into pJET1.2, and the sequence was verified. Finally, the *AgeI-NheI* fragment was inserted into the same cloning sites of YEpAtCURS2 to yield plasmid YEpAtCURS2-PT<sub>CcRADS2</sub>.

The plasmid YEpCcRADS2-PT<sub>AtCURS2</sub>, in which the gene segment encoding PT<sub>CcRADS2</sub> was replaced by the one encoding PT<sub>AtCURS2</sub>, was constructed using the following steps. A 378-bp upstream fragment encoding L<sup>1165</sup>-A<sup>1284</sup> of CcRADS2 was amplified with primers Cc\_PT\_Del\_Up\_F (Bsu36I) and Cc\_PT\_Up\_R. A 1,051-bp fragment encoding AtCURS2 P<sup>1270</sup>-V<sup>1613</sup> was amplified with primers At\_PT\_to\_Cc\_F and At\_PT\_to\_Cc\_R. A 1,388-bp downstream fragment encoding P<sup>1642</sup>-C<sup>2103</sup> of CcRADS2 was amplified with primers Cc\_PT\_Del\_Dn\_F and Cc\_PT\_Del\_Dn\_R (BglII). These three PCR fragments were then fused using primers Cc\_PT\_Del\_Up\_F (Bsu36I) and Cc\_PT\_Del\_Dn\_R (BglII) and cloned into pJET1.2, and the sequence was verified. Finally, the *Bsu36I-BglII* fragment was inserted into the same cloning sites of YEpCcRADS2 to yield plasmid YEpCcRADS2-PT<sub>AtCURS2</sub>.

The mutation encoding the F<sup>1459</sup>Y change was introduced into *atcurS2* by replacing the F<sup>TTC</sup> codon with Y<sup>TAC</sup>. A 1,038-bp upstream fragment was amplified using primers At\_PT\_Del\_Up\_F (AgeI) and Phe198Y\_R, and a 1,531-bp downstream fragment was generated with primers Tyr319F\_F and At\_PT\_Del\_Dn\_R (NheI). The two PCR products were fused using the At\_PT\_Del\_Up\_F (AgeI) and the At\_PT\_Del\_Dn\_R (NheI) primers, and the fragment was cloned into pJET1.2. After sequence verification, the *AgeI-NheI* fragment was inserted into the same cloning sites of YEpAtCURS2 to yield plasmid YEpAtCURS2(F<sup>1459</sup>Y).

The mutation encoding the Y<sup>1576</sup>F change was introduced into *atcurS2* by replacing the Y<sup>TAT</sup> codon with F<sup>TTT</sup>. A 1,390-bp upstream fragment was amplified using primers At\_PT\_Del\_Up\_F (AgeI) and Tyr319F\_R, and a 1,157-bp downstream fragment was generated with primers Trp327\_F and At\_PT\_Del\_Dn\_R (NheI). The two PCR products were fused using the At\_PT\_Del\_Up\_F (AgeI) and the At\_PT\_Del\_Dn\_R (NheI) primers, and the fragment was cloned into pJET1.2. After sequence verification, the *AgeI-NheI* fragment was inserted into the same cloning sites of YEpAtCURS2 to yield plasmid YEpAtCURS2(Y<sup>1576</sup>F).

The mutation encoding the W<sup>1584</sup>L change was introduced into *atcurS2* by replacing the W<sup>TGG</sup> codon with L<sup>TTG</sup>. A 1,393-bp upstream fragment was amplified using primers At\_PT\_Del\_Up\_F (AgeI) and Phe198Tyr319\_R, and a 1,153-bp downstream fragment was generated with primers Trp327L\_F -3' and At\_PT\_Del\_Dn\_R (NheI). The two PCR products were fused using the At\_PT\_Del\_Up\_F (AgeI) and the At\_PT\_Del\_Dn\_R (NheI) primers, and the fragment was cloned into pJET1.2. After sequence verification, the AgeI-NheI fragment was inserted into the same cloning sites of YEpAtCURS2 to yield plasmid YEpAtCURS2(W<sup>1584</sup>L).

The double mutation encoding the F<sup>1459</sup>Y and Y<sup>1576</sup>F change was introduced into *atcurS2* by replacing the F<sup>TTC</sup> codon with Y<sup>TAC</sup> and the Y<sup>TAT</sup> codon with F<sup>TTT</sup>. A 1,038-bp upstream fragment was amplified using primers At\_PT\_Del\_Up\_F (AgeI) and Phe198Y\_R, a 393-bp middle fragment was generated with primers Tyr319F\_F and Tyr319F\_R, and a 1,157-bp downstream fragment was amplified with primers Trp327\_F and At\_PT\_Del\_Dn\_R (NheI). The three PCR products were fused using the At\_PT\_Del\_Up\_F (AgeI) and At\_PT\_Del\_Dn\_R (NheI) primers, and the fragment was cloned into pJET1.2. After sequence verification, the AgeI-NheI fragment was inserted into the same cloning sites of YEpAtCURS2 to yield plasmid YEpAtCURS2(F<sup>1459</sup>Y, Y<sup>1576</sup>F).

The double mutation encoding the F<sup>1459</sup>Y and W<sup>1584</sup>L change was introduced into *atcurS2* by replacing the F<sup>TTC</sup> codon with Y<sup>TAC</sup> and the W<sup>TGG</sup> codon with L<sup>TTG</sup>. A 1,038-bp upstream fragment was amplified using primers At\_PT\_Del\_Up\_F (AgeI) and Phe198Y\_R, a 393-bp middle fragment was generated with primers Tyr319F\_F and Y319\_R, and a 1,153-bp downstream fragment was amplified with primers Trp327L\_F and At\_PT\_Del\_Dn\_R (NheI). The three PCR products were fused using the At\_PT\_Del\_Up\_F (AgeI) and At\_PT\_Del\_Dn\_R (NheI) primers, and the fragment was cloned into pJET1.2. After sequence verification, the AgeI-NheI fragment was inserted into the same cloning sites of YEpAtCURS2 to yield plasmid YEpAtCURS2(F<sup>1459</sup>Y, W<sup>1584</sup>L).

The double mutation encoding the Y<sup>1576</sup>F and W<sup>1584</sup>L change was introduced into *atcurS2* by replacing the Y<sup>TAT</sup> codon with F<sup>TTT</sup> and the W<sup>TGG</sup> codon with L<sup>TTG</sup>. A 1,390-bp upstream fragment was amplified using primers At\_PT\_Del\_Up\_F (AgeI) and Tyr319F\_R, and a 1,153-bp downstream fragment was generated with primers Trp327L\_F and At\_PT\_Del\_Dn\_R (NheI). The two PCR products were fused using the At\_PT\_Del\_Up\_F (AgeI) and At\_PT\_Del\_Dn\_R (NheI) primers, and the fragment was cloned into pJET1.2. After sequence verification, the AgeI-NheI fragment was inserted into the same cloning sites of YEpAtCURS2 to yield plasmid YEpAtCURS2(Y<sup>1576</sup>F, W<sup>1584</sup>L).

The triple mutation encoding the F<sup>1459</sup>Y, Y<sup>1576</sup>F, and W<sup>1584</sup>L change was introduced into *atcurS2* by replacing the F<sup>TTC</sup> codon with Y<sup>TAC</sup>, the Y<sup>TAT</sup> codon with F<sup>TTT</sup>, and the W<sup>TGG</sup> codon with L<sup>TTG</sup>. A 1,038-bp upstream fragment was amplified using primers At\_PT\_Del\_Up\_F (AgeI) and Phe198Y\_R, a 393-bp middle fragment was generated with primers Tyr319F\_F and Y319F\_R, and a 1,153-bp downstream fragment was generated with primers Trp327L\_F and At\_PT\_Del\_Dn\_R (NheI). The three PCR products were fused using the At\_PT\_Del\_Up\_F (AgeI) and At\_PT\_Del\_Dn\_R (NheI) primers, and the fragment was cloned into pJET1.2. After sequence verification, the AgeI-NheI fragment was inserted into the same cloning sites of YEpAtCURS2 to yield plasmid YEpAtCURS2(Y<sup>1576</sup>F, Y<sup>1576</sup>F, W<sup>1584</sup>L).

The mutation encoding the Y<sup>1483</sup>F change was introduced into *ccradS2* by replacing the Y<sup>TAC</sup> codon with F<sup>TTC</sup>. A 976-bp upstream fragment was amplified using primers Cc\_PT\_Del\_Up\_F (Bsu36I) and Y209F\_R, and a 1,864-bp downstream fragment was generated with primers Y209\_F and Cc\_PT\_Del\_Dn\_R (BglII). The two PCR products were fused using the Cc\_PT\_Del\_Up\_F (Bsu36I) and Cc\_PT\_Del\_Dn\_R (BglII) primers, and the fragment was cloned into pJET1.2. After sequence verification, the

*Bsu36I-BglII* fragment was inserted into the same cloning sites of YEpCcRADS2 to yield plasmid YEpCcRADS2(Y<sup>1483</sup>F).

The mutation encoding the F<sup>1602</sup>Y change was introduced into *ccradS2* by replacing the F<sup>TTC</sup> codon with Y<sup>TAC</sup>. A 1,332-bp upstream fragment was amplified using primers Cc\_PT\_Del\_Up\_F (Bsu36I) and F332Y\_R, and a 1,506-bp downstream fragment was generated with primers F332\_F and Cc\_PT\_Del\_Dn\_R (BglII). The two PCR products were fused using the Cc\_PT\_Del\_Up\_F (Bsu36I) and Cc\_PT\_Del\_Dn\_R (BglII) primers, and the fragment was cloned into pJET1.2. After sequence verification, the *Bsu36I-BglII* fragment was inserted into the same cloning sites of YEpCcRADS2 to yield plasmid YEpCcRADS2(F<sup>1602</sup>Y).

The mutation encoding the L<sup>1610</sup>W change was introduced into *ccradS2* by replacing the L<sup>CTG</sup> codon with W<sup>TGG</sup>. A 1,335-bp upstream fragment was amplified using primers Cc\_PT\_Del\_Up\_F (Bsu36I) and L340\_R, and a 1,504-bp downstream fragment was generated with primers L340W\_F and Cc\_PT\_Del\_Dn\_R (BglII). The two PCR products were fused using the Cc\_PT\_Del\_Up\_F (Bsu36I) and Cc\_PT\_Del\_Dn\_R (BglII) primers, and the fragment was cloned into pJET1.2. After sequence verification, the *Bsu36I-BglII* fragment was inserted into the same cloning sites of YEpCcRADS2 to yield plasmid YEpCcRADS2(L<sup>1610</sup>W).

The double mutation encoding the Y<sup>1483</sup>F and F<sup>1602</sup>Y change was introduced into *ccradS2* by replacing the Y<sup>TAC</sup> codon with F<sup>TTC</sup> and the F<sup>TTC</sup> codon with Y<sup>TAC</sup>. A 976-bp upstream fragment was amplified using primers Cc\_PT\_Del\_Up\_F (Bsu36I) and Y209F\_R, a 376-bp middle fragment was generated with primers Y209\_F and F332Y\_R, and a 1,506-bp downstream fragment was generated with primers F332\_F and Cc\_PT\_Del\_Dn\_R (BglII). The three PCR products were fused using the Cc\_PT\_Del\_Up\_F (Bsu36I) and Cc\_PT\_Del\_Dn\_R (BglII) primers, and the fragment was cloned into pJET1.2. After sequence verification, the *Bsu36I-BglII* fragment was inserted into the same cloning sites of YEpCcRADS2 to yield plasmid YEpCcRADS2(Y<sup>1483</sup>F, F<sup>1602</sup>Y).

The double mutation encoding the F<sup>1602</sup>Y and L<sup>1610</sup>W change was introduced into *ccradS2* by replacing the F<sup>TTC</sup> codon with Y<sup>TAC</sup> and the L<sup>CTG</sup> codon with W<sup>TGG</sup>. A 1,332-bp upstream fragment was amplified using primers Cc\_PT\_Del\_Up\_F (Bsu36I) and F332Y\_R, and a 1,504-bp downstream fragment was generated with primers L340W\_F and Cc\_PT\_Del\_Dn\_R (BglII). The two PCR products were fused using the Cc\_PT\_Del\_Up\_F (Bsu36I) and Cc\_PT\_Del\_Dn\_R (BglII) primers, and the fragment was cloned into pJET1.2. After sequence verification, the *Bsu36I-BglII* fragment was inserted into the same cloning sites of YEpCcRADS2 to yield plasmid YEpCcRADS2(F<sup>1602</sup>Y, L<sup>1610</sup>W).

The double mutation encoding the Y<sup>1483</sup>F and L<sup>1610</sup>W change was introduced into *ccradS2* by replacing the Y<sup>TAC</sup> codon with F<sup>TTC</sup> and the L<sup>CTG</sup> codon with W<sup>TGG</sup>. A 976-bp upstream fragment was amplified using primers Cc\_PT\_Del\_Up\_F (Bsu36I) and Y209F\_R, a 379-bp middle fragment was generated with primers Y209\_F and L340\_R, and a 1,504-bp downstream fragment was generated with primers L340W\_F and Cc\_PT\_Del\_Dn\_R (BglII). The three PCR products were fused using the Cc\_PT\_Del\_Up\_F (Bsu36I) and Cc\_PT\_Del\_Dn\_R (BglII) primers, and the fragment was cloned into pJET1.2. After sequence verification, the *Bsu36I-BglII* fragment was inserted into the same cloning sites of YEpCcRADS2 to yield plasmid YEpCcRADS2(Y<sup>1483</sup>F, L<sup>1610</sup>W).

The triple mutation encoding the Y<sup>1483</sup>F, F<sup>1602</sup>Y, and L<sup>1610</sup>W change was introduced into *ccradS2* by replacing the Y<sup>TAC</sup> codon with F<sup>TTC</sup>, the F<sup>TTC</sup> codon with Y<sup>TAC</sup>, and the L<sup>CTG</sup> codon with W<sup>TGG</sup>. A 976-bp upstream fragment was amplified using primers At\_PT\_Del\_Up\_F (AgeI) and Y209F\_R, a 376-bp middle fragment was generated with primers Y209\_F and F332Y\_R, and a 1,504-bp downstream fragment was generated with primers L340W\_F and Cc\_PT\_Del\_Dn\_R (BglII). The three PCR products were fused using the Cc\_PT\_Del\_Up\_F (Bsu36I) and Cc\_PT\_Del\_Dn\_R (BglII) primers, and the fragment was cloned into pJET1.2. After sequence verification, the *Bsu36I-BglII* fragment



was inserted into the same cloning sites of YEpCcRADS2 to yield plasmid YEpCcRADS2(Y<sup>1483</sup>F,F<sup>1602</sup>Y,L<sup>1610</sup>W).

**2. Heterologous Production and Isolation of Polyketides.** *Large-scale fermentation and isolation of products.* For a typical large-scale fermentation process, 20 250-mL Erlenmeyer flasks, each containing 50 mL 0.67% (wt/vol) yeast nitrogen base, 2% (wt/vol) glucose, and 0.72 g/L Trp/Ura DropOut medium, were inoculated with the appropriate yeast strain and cultivated at 30 °C with shaking at 300 rpm. After the OD<sub>600</sub> reached 1.0, 50 mL 1% (wt/vol) yeast extract and 2% (wt/vol) peptone (YP) medium was added to each flask, and the cultivation was continued for 3 d. The culture was centrifuged at 2,500 × g for 5 min to remove the yeast cells, and the supernatant was concentrated to 200 mL using a rotary evaporator. The concentrated broth was adjusted to pH 5.0 and extracted with 600 mL EtOAc three times. After evaporation of the solvent, the sample was loaded to a Diaion HP-20 column (4 × 30 cm) and successively eluted with H<sub>2</sub>O, 25% MeOH/H<sub>2</sub>O, and acetone. The acetone fraction was collected and further separated by HPLC using an Eclipse XDB C18 column (5 μm, 4.6 × 150 mm) and/or an Eclipse Plus C8 column (5 μm, 4.6 × 150 mm).

Compound **1** (monocillin II, 8.9 mg) was purified from the acetone fraction of the extract of *Saccharomyces cerevisiae* BJ5464-NpgA (YEpCcRADS1, YEpCcRADS2) by HPLC using an Eclipse XDB C18 column (52% CH<sub>3</sub>CN/H<sub>2</sub>O, 1 mL/min). Compound **2** (5.2 mg) was obtained by HPLC separation of the acetone fraction of the extract of *S. cerevisiae* BJ5464-NpgA [YEpAtCURS1, YEpAtCURS2] on an Eclipse XDB C18 column (41% CH<sub>3</sub>CN/H<sub>2</sub>O, 1 mL/min). Compounds **3** (3.1 mg) and **4** (3.2 mg) were purified from strain *S. cerevisiae* BJ5464-NpgA [YEpAtCURS1, YEpAtCURS2(F<sup>1455</sup>Y,Y<sup>1576</sup>F,W<sup>1584</sup>L)] by separation of the acetone fraction on an Eclipse XDB C18 column (39% CH<sub>3</sub>CN/H<sub>2</sub>O, 1 mL/min). Compound **5** (2.1 mg) was isolated from *S. cerevisiae* BJ5464-NpgA (YEpCcRADS1, YEpCcRADS2-PT<sub>AtCURS2</sub>) by HPLC separation of the acetone fraction on an Eclipse XDB C18 column (33% CH<sub>3</sub>CN/H<sub>2</sub>O, 1 mL/min) and an Eclipse Plus C8 column (22% CH<sub>3</sub>CN/H<sub>2</sub>O, 1 mL/min).

**Analysis of the time course of the production of 3 and 4.** Erlenmeyer flasks (125 mL) containing 50 mL 0.67% yeast nitrogen base, 2% glucose, and 0.72 g/L Trp/Ura DropOut medium were inoculated with *S. cerevisiae* BJ5464-NpgA (YEpAtCURS1, YEpAtCURS2-PT<sub>CcRADS2</sub>), and the cultures were incubated at 30 °C with shaking at 250 rpm. When the OD<sub>600</sub> reached 0.6 (referred to as 0 h in Fig. 3A), an equal volume of YP medium was added to the cultures, and the fermentation was continued at 30 °C with shaking at 250 rpm for an additional 3 d. One flask was harvested at 0, 24, 48, and 72 h after the addition of the YP medium, and the polyketide products were extracted and analyzed as described in *Materials and Methods, Small-Scale Fermentation and Analysis of Products*.

**Biotransformation of 3 to 4 by S. cerevisiae BJ5464-NpgA.** A 125 mL Erlenmeyer flask containing 20 mL yeast extract peptone dextrose agar (YPD) liquid medium was inoculated with the untransformed yeast host strain *S. cerevisiae* BJ5464-NpgA, and the culture was incubated overnight with shaking at 200 rpm at 30 °C. Two-milliliter aliquots of this starter culture were transferred to 250 mL Erlenmeyer flasks containing 50 mL fresh YPD medium each and cultured at 30 °C with shaking at 200 rpm for 3 h; 200 μg compound **3**, dissolved in 100 μL MeOH, were supplemented to each of the yeast cultures, and cultivation was continued at 30 °C with shaking at 200 rpm. One flask each was harvested at 0, 24, 48, and 72 h after the addition of **3** and extracted with an equal volume of ethyl acetate. The organic extracts were evaporated to dryness and analyzed by reversed-phase HPLC as described above. Controls consisted of **3** incubated for 72 h with shaking at 200 rpm at 30 °C in YPD medium that has not been inoculated with the yeast and a 72 h culture of *S. cerevisiae* BJ5464-NpgA without supplementation with **3**.

**3. Chemical Characterization of Polyketide Products.** Optical rotations were recorded on a Rudolph Autopol IV polarimeter with a 10-cm cell. Circular dichroism (CD) spectra were acquired with a JASCO J-810 instrument using a path length of 1 cm. <sup>1</sup>H, <sup>13</sup>C, and 2D NMR [homonuclear correlation spectroscopy (COSY), heteronuclear single-quantum correlation spectroscopy (HSQC), heteronuclear multiple-bond correlation spectroscopy (HMBC), and rotating frame nuclear Overhauser effect spectroscopy (ROESY)] spectra were recorded in DMSO-*d*<sub>6</sub>, CD<sub>3</sub>OD, or C<sub>5</sub>D<sub>5</sub>N on a JEOL ECX-300 Spectrometer [δ (ppm), *J* (Hz)]. ESI-MS data were collected on an Agilent 6130 Single Quad LC-MS.

Electrospray ionization mass spectrometry (ESI-MS) analysis revealed that the molecular weight of **1** (Fig. S2) is 316. A comparison of the retention time, UV spectrum (Fig. S5), and NMR data of **1** and authentic monocillin II (**3**) confirmed that they are identical.

ESI-MS of **2** showed the [M+H]<sup>+</sup> and [M+Na]<sup>+</sup> ion peaks at *m/z* 291.1 and 313.3, respectively, indicating that its molecular weight is 290. The <sup>1</sup>H NMR, <sup>13</sup>C NMR, and optical rotation data were in full agreement with the data reported in the literature for 10,11-dehydrocurvularin (**4**). Absolute configuration of C-15 was proved to be *S* by a comparison of the optical rotation and negative Cotton effect at 236 nm in the CD spectrum (Fig. S6) with the optical rotations and CD spectra of 15-*S*-dehydrocurvularin and 15-*R*-dehydrocurvularin (**5**, **6**). Thus, **2** was identified as 15-*S*-dehydrocurvularin (Fig. S2).

ESI-MS of **3** revealed that its molecular weight is 290, the same as the molecular weight of **2**. The <sup>13</sup>C NMR spectra showed 16 carbon signals, indicating that **3** is also an octaketide. However, unlike **2**, **3** showed a characteristic isocoumarin UV absorption spectrum (Fig. S5), suggesting that it is an isocoumarin analog. Based on the 1D (Table S1) and 2D NMR spectra (Fig. S3), **3** was identified as 6,8-dihydroxy-3-(6-hydroxyhept-1-enyl)-1*H*-isochromen-1-one, an isocoumarin with a 7-carbon side chain containing a double bond and a hydroxyl group. The double bond was determined to be *E* based on the large coupling constant between H-10 and H-11 (15.8 Hz in pyridine-*d*<sub>5</sub> and 15.5 Hz in DMSO-*d*<sub>6</sub>) (Table S1). Absolute configuration at C-15 in **3** was determined by Mosher's method. The Δδ-value (−0.02) of CH<sub>3</sub>-16 (Fig. S4) confirmed that C-15 in **3** is in the *S* configuration. Thus, **3** was characterized as (*S,E*)-6,8-dihydroxy-3-(6-hydroxyhept-1-enyl)-1*H*-isochromen-1-one (Fig. S2).

ESI-MS revealed that the molecular weight of **4** is 288, two mass units less than the molecular weight of **3**. The UV spectrum (Fig. S5) suggested that **4** is also an isocoumarin. The <sup>13</sup>C NMR spectrum of **4** is similar to the spectrum of **3**, except that there is a keto group (δ 208.8) at C-15 instead of a hydroxyl. Based on the 1D (Table S1) and 2D NMR spectra (Fig. S3), **4** was identified as (*E*)-6,8-dihydroxy-3-(6-oxohept-1-enyl)-1*H*-isochromen-1-one (Fig. S2).

The [M+H]<sup>+</sup> (*m/z* 335.2) and [M+Na]<sup>+</sup> (*m/z* 373.1) ion peaks indicated that the molecular weight of **5** is 334. The <sup>1</sup>H-<sup>1</sup>H COSY spectrum revealed the presence of a spin system (CH-CH<sub>2</sub>-CH<sub>2</sub>-CH = CH-CH<sub>2</sub>-CH-CH<sub>3</sub>) that contains two oxygenated methines at δ<sub>H</sub> 4.32 (m, 1H) and 3.55 (m, 1H) and one double bond. The configuration of the Δ<sup>14,15</sup> double bond was assigned as *E* according to the coupling constant (*J*<sub>14/15</sub> = 15.8 Hz in pyridine-*d*<sub>5</sub>). The <sup>1</sup>H-<sup>1</sup>H COSY and ROESY correlations of H-17 with OH-17 indicated the presence of a free hydroxyl group at C-17 (Figs. S3 and S7). Thus, the lactone bond was deduced to be formed between C-1 and C-11. The CD spectrum of **5** showed negative Cotton effect at 211 nm corresponding to the lactone bond (Fig. S6), which was consistent with 15-*S*-dehydrocurvularin derivatives and opposite to 15-*R*-dehydrocurvularin (**5**–**7**). Because the chiral carbon C-17 was not close enough to strongly affect the Cotton effect arising from the lactone bond (**6**), the absolute configuration of C-11 could be elucidated as 1*S*. Configuration at C-17 in **5** was established as 1*R* based on the Δδ-value (+0.08) using Mosher's

method (Fig. S4). Therefore, the structure of **5** was determined to be (*S*)-7,9-dihydroxy-4-((*R,E*)-6-hydroxyhept-3-enyl)-4,5-dihydro-1*H*-benzo[*d*]oxocine-2,6-dione (Fig. S2).

Monocillin II (**1**): colorless solid; <sup>1</sup>H NMR (300 MHz, pyridine-*d*<sub>5</sub>): δ 6.90 (m, 1H), 6.85 (d, *J* = 1.8 Hz, 1H), 6.83 (d, *J* = 1.8 Hz, 1H), 6.11 (d, *J* = 15.8 Hz, 1H), 5.38 (dt, *J* = 16.1, 6.2 Hz, 1H), 5.27 (m, 1H), 5.17 (overlap, 1H), 4.29 (d, *J* = 16.2 Hz, 1H), 4.16 (d, *J* = 16.2 Hz, 1H), 2.54 (m, 1H), 2.17 (m, 1H), 2.03 (m, 4H), 1.30 (d, *J* = 6.5 Hz, 3H); <sup>13</sup>C NMR (75 MHz, pyridine-*d*<sub>5</sub>): δ 197.3, 170.6, 164.6, 163.8, 147.9, 140.0, 132.3, 131.2, 128.5, 112.6, 108.8, 103.3, 72.4, 48.3, 38.1, 31.6, 31.5, 19.2; ESI-MS (–): [M-H]<sup>–</sup> *m/z* 315.1; ESI-MS (+): [M+H]<sup>+</sup> *m/z* 316.9.

10,11-Dehydrocurvularin (**2**): pale yellow amorphous solid; [α]<sub>D</sub><sup>23</sup> = –23.8° (4.5 mM in MeOH); <sup>1</sup>H NMR (300 MHz, CD<sub>3</sub>OD): δ 6.56 (m, 1H), 6.49 (d, *J* = 15.8 Hz, 1H), 6.29 (s, 1H), 6.25 (s, 1H), 4.75 (m, 1H), 3.69 (d, *J* = 16.5 Hz, 1H), 3.45 (d, *J* = 16.5 Hz, 1H), 2.20–2.45 (m, 2H), 1.81–2.03 (m, 2H), 1.52–1.56 (m, 2H), 1.18 (d, *J* = 6.3 Hz, 3H); <sup>13</sup>C NMR (75 MHz, CD<sub>3</sub>OD): δ 197.2, 172.5, 163.8, 160.9, 150.0, 138.5, 132.4, 116.5, 112.3, 102.2, 71.1, 41.6, 33.7, 32.9, 24.5, 19.1; CD: δε<sub>236</sub> –2.32, δε<sub>300</sub> –0.33, δε<sub>336</sub> +0.16 (4.5 mM in MeOH); ESI-MS (–): [M-H]<sup>–</sup> *m/z* 289.1; ESI-MS (+): [M+H]<sup>+</sup> *m/z* 291.1, [M+Na]<sup>+</sup> *m/z* 313.3.

Compound **3**: pale yellow amorphous solid; [α]<sub>D</sub><sup>23</sup> = +11.4° (1.2 mM in CHCl<sub>3</sub>); <sup>1</sup>H and <sup>13</sup>C NMR in CD<sub>3</sub>OD (Table S1); <sup>1</sup>H NMR (300 MHz, pyridine-*d*<sub>5</sub>): δ 6.84 (d, *J* = 2.1 Hz, 1H), 6.71 (d, *J* = 2.1 Hz, 1H), 6.60 (dt, *J* = 15.8, 7.2 Hz, 1H), 6.37 (s, 1H), 6.11 (d, *J* = 15.8 Hz, 1H), 4.02 (m, 1H), 2.21 (m, 1H), 1.73 (m, 1H), 1.59 (m, 1H), 1.36 (d, *J* = 6.2 Hz, 1H); ESI-MS (–): [M-H]<sup>–</sup> *m/z* 289.1; ESI-MS (+): [M+H]<sup>+</sup> *m/z* 291.1, [M+Na]<sup>+</sup> *m/z* 313.1.

Compound **4**: white amorphous solid; <sup>1</sup>H and <sup>13</sup>C NMR (Table S1); ESI-MS (–): [M-H]<sup>–</sup> *m/z* 287.1; ESI-MS (+): [M+H]<sup>+</sup> *m/z* 289.1.

Compound **5**: white amorphous solid; [α]<sub>D</sub><sup>23</sup> = –14.0° (1.5 mM in MeOH); <sup>1</sup>H and <sup>13</sup>C NMR in DMSO-*d*<sub>6</sub> (Table S1); <sup>1</sup>H NMR (300 MHz, pyridine-*d*<sub>5</sub>): δ 6.94 (s, 1H), 6.80 (s, 1H), 5.72 (dt, *J* = 15.8, 7.2 Hz, 1H), 5.53 (dt, *J* = 15.8, 7.6 Hz, 1H), 4.57 (d, *J* = 17.9 Hz, 1H), 4.49 (d, *J* = 17.9 Hz, 1H), 4.40 (m, 1H), 4.06 (m, 1H), 2.66

(d, *J* = 7.6 Hz, 2H), 2.42 (m, 1H), 2.33 (m, 1H), 2.18 (m, 2H), 1.84 (m, 1H), 1.65 (m, 1H), 1.34 (d, *J* = 5.8 Hz, 3H); CD: δε<sub>211</sub> –0.71, δε<sub>265</sub> +0.01, δε<sub>278</sub> +0.02, δε<sub>303</sub> +0.03, δε<sub>333</sub> –0.06 (3.1 mM in MeOH); ESI-MS (–): [M-H]<sup>–</sup> *m/z* 333.1; ESI-MS (+): [M+H]<sup>+</sup> *m/z* 335.2, [M+Na]<sup>+</sup> *m/z* 357.2, [M+K]<sup>+</sup> *m/z* 373.1.

**1.4. Preparation of Mosher Ester Derivatives of 3 and 5.** One-half milligram **3** or **5** was transferred into a clean and completely dry NMR tube. Deuterated pyridine (0.5 mL) and (*S*)-(+)-α-methoxy-α-(trifluoromethyl)phenylacetyl chloride [(*S*)-MTPA-Cl]; 6 μL] were added to each NMR tube immediately, and the tubes were shaken carefully to evenly mix the sample with (*S*)-MTPA-Cl. The reaction mixtures were incubated at 15 °C for 12 h to yield the MTPA esters **3-S** and **5-S**, respectively. The esters **3-R** and **5-R** were obtained similarly by reacting **3** and **5** with (*R*)-MTPA-Cl, respectively.

Compound **3-S**: <sup>1</sup>H-NMR (300 MHz, pyridine-*d*<sub>5</sub>): δ 6.95 (d, *J* = 2.2 Hz, 1H), 6.87 (d, *J* = 2.2 Hz, 1H), 6.53 (m, 1H), 6.34 (s, 1H), 6.08 (d, *J* = 15.7 Hz, 1H), 3.65 (m, 2H), 2.19–1.57 (m, 6), 1.32 (d, *J* = 6.3 Hz, 3H); ESI-MS (–): [M-H]<sup>–</sup> *m/z* 505.2; ESI-MS (+): [M+Na]<sup>+</sup> *m/z* 529.1

Compound **3-R**: <sup>1</sup>H-NMR (300 MHz, pyridine-*d*<sub>5</sub>): δ 6.95 (d, *J* = 2.1 Hz, 1H), 6.86 (d, *J* = 2.1 Hz, 1H), 6.52 (m, 1H), 6.34 (s, 1H), 6.09 (d, *J* = 14.7 Hz, 1H), 3.61 (m, 2H), 2.17–1.54 (m, 6H), 1.34 (d, *J* = 6.3 Hz, 3H); ESI-MS (–): [M-H]<sup>–</sup> *m/z* 505.1; ESI-MS (+): [M+Na]<sup>+</sup> *m/z* 529.2.

Compound **5-S**: <sup>1</sup>H-NMR (300 MHz, pyridine-*d*<sub>5</sub>): δ 6.95 (s, 1H), 6.79 (s, 1H), 5.38 (m, 2H), 4.10 (m, 1H), 3.96 (overlap, 1H), 3.84 (overlap, 1H), 3.63 (overlap, 1H), 2.33 (m, 3H), 2.16 (m, 3H), 1.87 (m, 1H), 1.72 (m, 1H), 1.29 (d, *J* = 6.5 Hz, 3H); ESI-MS (–): [M-H]<sup>–</sup> *m/z* 549.1; ESI-MS (+): [M+H]<sup>+</sup> *m/z* 550.8, [M+Na]<sup>+</sup> *m/z* 572.7.

Compound **5-R**: <sup>1</sup>H-NMR (300 MHz, pyridine-*d*<sub>5</sub>): δ 6.95 (s, 1H), 6.80 (s, 1H), 5.37 (m, 2H), 4.10 (m, 1H), 3.95 (overlap, 1H), 3.84 (overlap, 1H), 3.63 (overlap, 1H), 2.36 (m, 3H), 2.21 (m, 3H), 1.91 (m, 1H), 1.79 (m, 1H), 1.21 (d, *J* = 6.2 Hz, 3H); ESI-MS (–): [M-H]<sup>–</sup> *m/z* 549.2; ESI-MS (+): [M+H]<sup>+</sup> *m/z* 550.8, [M+Na]<sup>+</sup> *m/z* 572.9.

- Wang S, et al. (2008) Functional characterization of the biosynthesis of radicicol, an Hsp90 inhibitor resorcylic acid lactone from *Chaetomium chiversii*. *Chem Biol* 15(12): 1328–1338.
- Udway DW, Merski M, Townsend CA (2002) A method for prediction of the locations of linker regions within large multifunctional proteins, and application to a type I polyketide synthase. *J Mol Biol* 323(3):585–598.
- Zeng J, Valiente J, Zhan J (2011) Specific inhibition of the halogenase for radicicol biosynthesis by bromide at the transcriptional level in *Pochonia chlamydosporia*. *Biotechnol Lett* 33(2):333–338.
- Zhan J, et al. (2004) A new anthraquinone and cytotoxic curvularins of a *Penicillium* sp. from the rhizosphere of *Fallugia paradoxa* of the Sonoran desert. *J Antibiot (Tokyo)* 57(5):341–344.
- Bicalho B, Gonçalves RA, Zibordi AP, Manfio GP, Marsaioli AJ (2003) Antimicrobial compounds of fungi vectored by *Clusia* spp. (Clusiaceae) pollinating bees. *Z Naturforsch C* 58(9–10):746–751.
- Greve H, et al. (2008) Apralactone A and a new stereochemical class of curvularins from the marine fungus *Curvularia* sp. *Eur J Org Chem* 2008(30):5085–5092.
- Dai J, et al. (2010) Curvularin-type metabolites from the fungus *Curvularia* sp. isolated from a marine alga. *Eur J Org Chem* 2010(36):6928–6937.



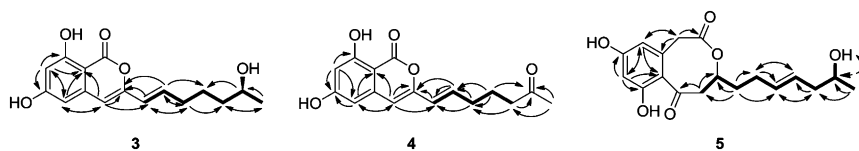

Fig. S3. Key HMBC (→), <sup>1</sup>H-<sup>1</sup>H-COSY (---), and ROESY (····) correlations for 3–5.

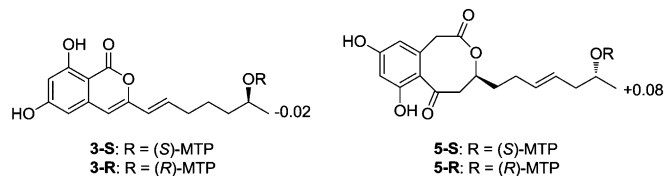

Fig. S4.  $\Delta\delta$ -Values [ $\Delta\delta$  (ppm) =  $\delta_S - \delta_R$ ] obtained for (S)- and (R)- $\alpha$ -methoxy- $\alpha$ -(trifluoromethyl)phenylacetic acid esters of 3 and 5.

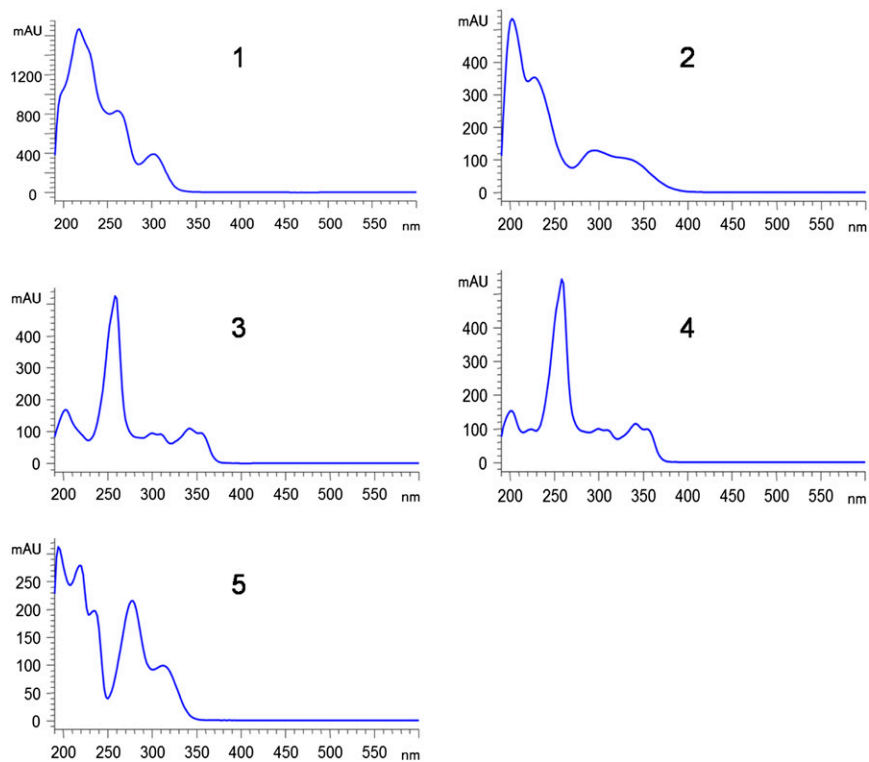

Fig. S5. The UV spectra of 1–5.



Table S1. NMR data for 3–5

| No.   | 3          |                          | 4          |                    | 5          |                           |
|-------|------------|--------------------------|------------|--------------------|------------|---------------------------|
|       | $\delta_C$ | $\delta_H$               | $\delta_C$ | $\delta_H$         | $\delta_C$ | $\delta_H$                |
| 1     | 165.9      |                          | 163.9      |                    | 172.5      |                           |
| 2     | 98.7       |                          | 99.4       |                    | 40.2       | 3.76 (s, 2H)              |
| 3     | 163.6      |                          | 165.5      |                    | 140.0      |                           |
| 4     | 104.5      | 6.29 (s, 1H)             | 105.4      | 6.20 (s, 1H)       | 112.7      | 6.26 (s, 1H)              |
| 5     | 166.0      |                          | 167.3      |                    | 163.4      |                           |
| 6     | 103.0      | 6.31 (s, 1H)             | 104.2      | 6.33 (s, 1H)       | 102.3      | 6.22 (s, 1H)              |
| 7     | 140.1      |                          | 139.9      |                    | 164.5      |                           |
| 8     | 101.4      | 6.34 (s, 1H)             | 102.5      | 6.56 (s, 1H)       | 114.8      |                           |
| 9     | 152.0      |                          | 151.6      |                    | 191.7      |                           |
| 10    | 121.9      | 6.13 (d, 1H, 15.9)       | 122.8      | 6.14 (d, 1H, 15.5) | 43.1       | 2.51 (m, 2H)              |
| 11    | 136.0      | 6.51 (dt, 1H, 15.9, 7.2) | 135.6      | 6.33 (m, 1H)       | 76.8       | 4.32 (m, 1H)              |
| 12    | 32.3       | 2.24 (m, 2H)             | 31.8       | 2.27 (m, 2H)       | 34.2       | 1.64 (m, 1H) 1.74 (m, 1H) |
| 13    | 24.8       | 1.32 (m, 2H)             | 22.8       | 1.61 (m, 2H)       | 29.1       | 2.10 (m, 2H)              |
| 14    | 38.3       | 1.61 (m, 2H)             | 42.5       | 2.42 (m, 2H)       | 131.2      | 5.38 (m, 1H)              |
| 15    | 67.0       | 3.74 (m, 1H)             | 208.8      |                    | 128.3      | 5.38 (m, 1H)              |
| 16    | 22.2       | 1.14 (d, 1H, 6.2)        | 29.8       | 2.01 (s, 3H)       | 42.8       | 1.98 (m, 1H)              |
| 17    |            |                          |            |                    | 66.5       | 3.55 (m, 1H)              |
| 18    |            |                          |            |                    | 23.5       | 0.98 (d, 3H, 8.2)         |
| 17-OH |            |                          |            |                    |            | 4.38 (brs)                |

<sup>1</sup>H (300 MHz) and <sup>13</sup>C NMR (75 MHz) data for 3–5 (3 in CD<sub>3</sub>OD and 4 and 5 in DMSO-*d*<sub>6</sub>; *J* in Hertz and  $\delta$  in parts per million).
